# Supplementary material
Source: HighWire-hosted journal article supplement (https://bjgpopen.org/content/suppl/2024/08/14/BJGPO.2024.0010)
Supplement: MRW_10.3399BJGPO.2024.0010_2.pdf [file MRW_10.3399BJGPO.2024.0010_2.pdf]

## Supplementary Information S1

### **Interview guide**

Question 1: How did you experience the process of taking up VCs?

Question 2: How do you experience using VCs in your GP work now?

Question 3: What do you perceive as the best reasons for using VC?

Question 4: What do you perceive as the most prominent reasons for not using VC?

Question 5: Do you believe that VCs have a place in the future of general practice?

Question 6: Do you believe that the GP profession has taken a step in the right direction towards the “general practice of tomorrow” by taking up VC?
